# Supplementary material for: Multicentre pilot randomised clinical trial of early in-bed cycle ergometry with ventilated patients
Source: PubMed Central journal article supplement — BMJ Open Respir Res. 2019 Feb 18;6(1):e000383. doi: 10.1136/bmjresp-2018-000383 (PMC6424272; doi:10.1136/bmjresp-2018-000383), 2019-02-18
Supplement: bmjresp-2018-000383supp002.pdf [file bmjresp-2018-000383supp002.pdf]

**Electronic Supplement 2: Routine physical therapy interventions received by group**

|                                                                                   | <b>Total</b>     | <b>Cycling</b>   | <b>Routine</b>   |
|-----------------------------------------------------------------------------------|------------------|------------------|------------------|
| <b>Total weekdays for routine physical therapy, N</b>                             | <b>592</b>       | <b>330</b>       | <b>262</b>       |
| <b>Days with exemptions, N (%)</b>                                                | <b>99 (16.7)</b> | <b>52 (15.7)</b> | <b>47 (17.9)</b> |
| ICU or research team perception that routine physical therapy was not appropriate | 81 (81.8)        | 38 (73.0)        | 43 (91.4)        |
| Change in goals of care                                                           | 18 (18.2)        | 14 (26.9)        | 4 (8.5)          |
| <b>Eligible days for routine physical therapy, N</b>                              | <b>493</b>       | <b>278</b>       | <b>215</b>       |
| <b>Reasons why routine physical therapy did not occur (n=48), N (%)</b>           | <b>48 (9.7)</b>  | <b>31 (11.2)</b> | <b>17 (7.9)</b>  |
| <b>Therapist factors</b>                                                          | <b>37 (7.5)</b>  | <b>25 (9.0)</b>  | <b>12 (5.6)</b>  |
| Routine physical therapy not offered                                              | 22 (4.4)         | 16 (5.8)         | 6 (2.8)          |
| Not available due to workload                                                     | 11 (2.2)         | 5 (1.8)          | 6 (2.8)          |
| Cycling prioritized                                                               | 4 (0.8)          | 4 (1.4)          | 0                |
| <b>Patient factors</b>                                                            | <b>7 (1.4)</b>   | <b>5 (1.8)</b>   | <b>2 (0.9)</b>   |
| Patient declined                                                                  | 6 (1.2)          | 4 (1.4)          | 2 (0.9)          |
| Patient not available                                                             | 1 (0.2)          | 1 (0.4)          | 0                |
| Other                                                                             | 4 (0.8)          | 1 (0.4)          | 3 (1.4)          |
| <b>Reported physical therapy interventions*</b>                                   | <b>N=445</b>     | <b>N=247</b>     | <b>N=198</b>     |
| Respiratory assessment, n (%)                                                     | 343 (77.1)       | 200 (81.0)       | 143 (72.2)       |
| Mobility activities, n (%) <sup>a</sup>                                           | 265 (59.6)       | 145 (58.7)       | 120 (60.6)       |
| Rolling, n (%)                                                                    | 206 (47.0)       | 119 (49.4)       | 87 (44.2)        |
| Lie to sit, n (%)                                                                 | 168 (38.2)       | 88 (36.1)        | 80 (40.8)        |
| Sit at edge of bed, n (%)                                                         | 170 (38.6)       | 92 (37.7)        | 78 (39.8)        |
| Sit to stand, n (%)                                                               | 133 (30.5)       | 78 (32.1)        | 55 (28.5)        |
| Bed to chair transfer, n (%)                                                      | 110 (25.5)       | 64 (26.7)        | 46 (24.0)        |
| March on the spot, n (%)                                                          | 80 (18.4)        | 53 (22.1)        | 27 (13.9)        |
| Walking, n (%)                                                                    | 41 (9.5)         | 22 (9.3)         | 19 (9.8)         |
| Airway clearance, n (%)                                                           | 243 (54.6)       | 144 (58.3)       | 99 (50.0)        |
| Range of motion                                                                   |                  |                  |                  |
| Passive, n (%)                                                                    | 199 (44.7)       | 103 (41.7)       | 96 (48.5)        |
| Active-assisted, n (%)                                                            | 164 (36.9)       | 71 (28.7)        | 93 (47.0)        |
| Active, n (%)                                                                     | 123 (27.6)       | 75 (30.4)        | 48 (24.2)        |
| Passive transfer to chair, n (%)                                                  | 17 (3.8)         | 5 (2.0)          | 12 (6.1)         |
| Neuromuscular electrical stimulation, n (%)                                       | 1 (0.2)          | 1 (0.4)          | 0                |
| <b>Advanced life support received during routine physical therapy sessions</b>    | <b>N=445</b>     | <b>N=247</b>     | <b>N=198</b>     |
| Mechanical ventilation, n (%)                                                     | 313 (70.3)       | 163 (66.0)       | 150 (75.6)       |
| Oral endotracheal tube, n (%)                                                     | 248 (55.7)       | 128 (51.8)       | 120 (60.6)       |
| Tracheostomy, n (%)                                                               | 61 (13.7)        | 32 (13.0)        | 29 (14.6)        |
| Non-invasive, n (%)                                                               | 4 (0.9)          | 3 (1.2)          | 1 (0.5)          |
| Other advanced ventilation, n (%)                                                 | 26 (5.8)         | 9 (3.6)          | 17 (8.6)         |
| Renal replacement therapy, n (%)                                                  | 22 (4.9)         | 8 (3.2)          | 14 (7.1)         |
| Vasopressor or inotrope infusion, n (%)                                           | 47 (10.6)        | 26 (10.5)        | 21 (10.6)        |

|                                                                 | <b>Total</b> | <b>Cycling</b>    | <b>Routine</b> |
|-----------------------------------------------------------------|--------------|-------------------|----------------|
| <b>Mobility milestones achieved per patient, n (%)</b>          | N=65         | N=35 <sup>†</sup> | N=30           |
| Rolling, n (%)                                                  | 47 (72.3)    | 25 (71.4)         | 22 (73.3)      |
| Lie to sit, n (%)                                               | 46 (70.8)    | 24 (68.6)         | 22 (73.3)      |
| Sit at edge of bed, n (%)                                       | 45 (69.2)    | 24 (68.6)         | 21 (70.0)      |
| Sit to stand, n (%)                                             | 38 (58.5)    | 20 (57.1)         | 18 (60.0)      |
| Bed to chair transfer, n (%)                                    | 32 (49.2)    | 18 (51.4)         | 14 (46.7)      |
| March on the spot, n (%)                                        | 31 (47.7)    | 17 (48.8)         | 14 (46.7)      |
| Walking, n (%)                                                  | 18 (27.7)    | 10 (28.6)         | 8 (26.7)       |
| ICU Mobility Scale(51), highest level per patient, median (IQR) | 5 (2 - 7)    | 6 (2 - 7.5)       | 5 (3 - 7)      |

**Legend:** This table outlines the routine physical therapy interventions by group. \*Denominators for mobility activities (Total, Cycling, Routine): Mobility activities: 445, 247, 198; Rolling: 438, 241, 197; Lie to sit: 440, 244, 196; Sit at edge of bed: 440, 244, 196; Sit to stand: 436, 243, 193; Bed to chair transfer: 432, 240, 192; March on the spot: 434, 240, 194; Walking: 430, 236, 194. <sup>†</sup>Data missing for mobility milestones for 1 person. Abbreviations: ICU = intensive care unit. The ICU Mobility Scale is an 11 point scale representing the highest level of mobilization in the ICU (maximum = 10, higher scores represent better mobility)
