# Supplementary material for: Multicentre pilot randomised clinical trial of early in-bed cycle ergometry with ventilated patients
Source: PubMed Central journal article supplement — BMJ Open Respir Res. 2019 Feb 18;6(1):e000383. doi: 10.1136/bmjresp-2018-000383 (PMC6424272; doi:10.1136/bmjresp-2018-000383), 2019-02-18
Supplement: bmjresp-2018-000383supp003.pdf [file bmjresp-2018-000383supp003.pdf]

## Electronic Supplement 3: Outcome measures

| Outcome                                 | ICU Awakening <sup>a</sup> |              |                        | ICU discharge <sup>b</sup> |                      |                        | Hospital discharge <sup>c</sup> |              |                        |
|-----------------------------------------|----------------------------|--------------|------------------------|----------------------------|----------------------|------------------------|---------------------------------|--------------|------------------------|
|                                         | Cycling                    | Routine      |                        | Cycling                    | Routine              |                        | Cycling                         | Routine      |                        |
| <b>Performance-based outcomes</b>       |                            |              |                        |                            |                      |                        |                                 |              |                        |
| PFIT-s, mean (SD)                       | 4.4 (2.0)                  | 4.4 (2.2)    | 0.03 (-1.2, 1.2)       | 5.7 (2.0)                  | 6.0 (2.5)            | -0.3 (-1.6,1.0)        | 7.8 (1.9)                       | 8.1 (1.7)    | -0.3 (-1.5,0.8)        |
| Blinded PFIT-s, mean (SD)               |                            |              |                        |                            |                      |                        | 7.8 (1.9)                       | 8.1 (1.7)    | -0.3 (-1.5,0.9)        |
| MRCSS, mean (SD)                        | 42.8 (12.1)                | 43.5 (12.1)  | -0.7 (-7.8, 6.4)       | 46.3 (12.1)                | 52.4 (5.2)           | -6.1 (-11.4,-0.7)      | 53.7 (5.1)                      | 53.4 (5.6)   | 0.4 (-8.5,16.5)        |
| MRCSS <48, n (%)                        | 16/23 (69.6)               | 14/24 (58.3) | RR = 1.19 (0.77, 1.84) | 13/28 (46.4)               | 3/16 (18.8)          | RR = 2.48 (0.83, 7.40) | 3/23 (13.0)                     | 4/18 (22.2)  | RR = 0.59 (0.15, 2.30) |
| 30STS, median (IQR) # reps              | 1 (1-2)                    | 1 (1-2)      |                        | 1.5 (1-4)                  | 1.5 (1-3)            |                        | 4.5 (2-8)                       | 5 (4-8)      |                        |
| 2MWT, median (IQR) meters               |                            |              |                        | 30.5 (24-56)               | 33.5 (20-49.5)       |                        | 76 (51-116)                     | 61 (60-90)   |                        |
| Quadriceps strength, mean (SD), Newtons |                            |              |                        | 102.3 (69.2)               | 108.9 (50.6)         |                        | 117.2 (57.1)                    | 147.1 (57.7) |                        |
| Katz, median (IQR)                      |                            |              |                        | 1 (0-2.5)                  | 1 (0-3)              |                        | 4 (1-6)                         | 5 (4-8)      |                        |
| <b>Patient-reported outcomes</b>        |                            |              |                        |                            |                      |                        |                                 |              |                        |
| IPAT, mean (SD)                         |                            |              |                        | Cycling<br>6.3 (3.9)       | Routine<br>6.9 (4.5) |                        | Cycling                         | Routine      |                        |
| IPAT ≥ 8, n (%)                         |                            |              |                        | 7/27 (25.9)                | 9/22 (40.9)          | RR = 0.63 (0.28, 1.43) |                                 |              |                        |
| PRFS-ICU, mean (SD)                     |                            |              |                        | 4.8 (3.1)                  | 4.5 (3.0)            | 0.3 (-1.5,2.2)         | 6.4 (2.4)                       | 6.0 (2.3)    | 0.4 (-1.4,2.2)         |
| EQ5D5L utility, mean (SD)               |                            |              |                        | 0.57(0.27)                 | 0.56(0.27)           | 0.01 (-0.16,0.17)      | 0.69 (0.20)                     | 0.67 (0.21)  | 0.02 (-0.11,0.16)      |
| EQ5D5L VAS, mean (SD)                   |                            |              |                        | 56.5 (22.8)                | 53.9 (27.3)          | 2.6 (-13.1,18.2)       | 69.8 (16.7)                     | 65.8 (21.4)  | 4.0 (-8.5,16.5)        |

**Legend:** This table outlines the patients' ICU and hospital outcomes, and their performance-based and patient-reported outcomes recorded at ICU awakening, ICU discharge, and hospital discharge (as applicable). Abbreviations: ICU=Intensive care unit; CI=confidence interval; LOS=length of stay; IQR=interquartile range; PFIT-s=Physical Function ICU Test-scored (maximum=10; higher scores, better function); MRCSS=Medical Research Council sum score (maximum=60; higher scores, better strength);

30STS30=second sit to stand (more repetitions=better function); reps=repetitions; 2MWT=2 minute walk test (further distance=better function); Katz=Katz activities of daily living (maximum=6; higher scores, more independence in function); IPAT= Intensive Care Psychological Assessment tool (maximum=20; higher scores, higher risk of post-ICU psychological distress); PRFS-ICU=Patient-reported functional scale for ICU (maximum=10; higher scores, better perception of function); EQ5D5L utility=Euro-QOL5D5L quality of life utility (maximum=1.0; higher scores, better quality of life); EQ5D5L VAS= Euro-QOL5D5L visual analogue scale (maximum=100; higher scores, better quality of life). All values are mean (SD) unless otherwise specified. Abbreviations: IQR = interquartile range; ADL = activities of daily living; ICU = intensive care unit.

<sup>a</sup>Sample size for assessments performed at ICU Awakening (Cycling, routine): PFIT-s (27, 25); MRC Sum Score and MRC total score <48, (23, 24); 30STS (15, 13)

<sup>b</sup>Sample size for assessments performed at ICU Discharge (Cycling, routine): PFIT-s (28, 20); MRC Sum Score and MRC total score <48, (28, 16); 30STS (24, 18), 2MWT (10, 8); quadriceps strength (15, 14); Katz ADLs (28, 21); IPAT (27, 22); PRFS-ICU (25, 19); EQ5D5L Utility (24, 19); EQ5D5L VAS (24, 18).

<sup>c</sup>Sample size for assessments performed at Hospital Discharge (Cycling, routine): PFIT-s (25, 18); PFIT-s, blinded assessors (20, 17); MRC Sum Score and MRC total score <48, (23, 18); 30STS (22, 17), 2MWT (18, 16); quadriceps strength (16, 14); Katz ADLs (26, 18); PRFS-ICU (23, 18); EQ5D5L Utility and EQ5D5L VAS (21, 17).
